# Supplementary material for: Supramolecular D⋯A-layered structures based on germanium complexes with 2,3-dihydroxynaphthalene and N,N′-bidentate ligands
Source: Royal Society of Chemistry journal article supplement (doi:10.1039/d1ra02691g), 2021-01-01
Supplement: d1ra02691g1.pdf [file d1ra02691g1.pdf]

## Supramolecular D $\cdots$ A - layered structures based on germanium complexes with 2,3-dihydroxynaphthalene and N,N'-bidentate ligands

Pavel G. Shangin,<sup>a</sup> Irina V. Krylova,<sup>a</sup> Andrey V. Lalov,<sup>a</sup> Anna Ya. Kozmenkova,<sup>a</sup>  
Evgeniya A. Saverina,<sup>a</sup> Petr A. Buikin,<sup>b</sup> Alexander A. Korlyukov,<sup>b</sup> Alyona A. Starikova,<sup>c</sup>  
Elena N. Nikolaevskaya,<sup>a</sup> Mikhail P. Egorov,<sup>a</sup> Mikhail A. Syroeshkin<sup>a</sup>

<sup>a</sup> N.D. Zelinsky Institute of Organic Chemistry, 119991 Moscow, Russia, syroeshkin@ioc.ac.ru

<sup>b</sup> A.N. Nesmeyanov Institute of Organoelement Compounds, 119991 Moscow, Russia

<sup>c</sup> Institute of Physical and Organic Chemistry, Southern Federal University, 344090 Rostov-on-Don, Russia

### Supporting Information

**Table S1.** Total energies without ( $E_{\text{total}}$ , a.u.) and with taking into account for the energies of zero-point harmonic vibrations ( $E_{\text{total}}^{\text{ZPE}}$ , a.u.), relative energies without ( $E$ , kcal mol<sup>-1</sup>) and with taking into account for the energies of zero-point harmonic vibrations ( $E^{\text{ZPE}}$ , kcal mol<sup>-1</sup>) calculated by DFT B3LYP/Def2TZVP method.

| Structure                              | $E_{\text{total}}$ | $E$    | $E_{\text{total}}^{\text{ZPE}}$ | $E^{\text{ZPE}}$ |
|----------------------------------------|--------------------|--------|---------------------------------|------------------|
| <b>1</b>                               | -3147.806967       |        | -3147.537973                    |                  |
| <b>2</b>                               | -3643.407174       | 0.0    | -3642.977600                    | 0.0              |
| <b>2</b> radical-anion                 | -3643.490719       | -219.5 | -3643.065475                    | -230.9           |
| <b>2</b> radical-cation                | -3643.178121       | 601.8  | -3642.749546                    | 599.2            |
| <b>3</b>                               | -3719.662628       | 0.0    | -3719.220326                    | 0.0              |
| <b>3</b> radical-anion                 | -3719.743689       | -213.0 | -3719.306163                    | -225.5           |
| <b>3</b> radical-cation                | -3719.434095       | 600.4  | -3718.992614                    | 598.3            |
| 2,3-dihydroxynaphthalene <i>H-bond</i> | -536.545378        | 0.0    | -536.390113                     | 0.0              |
| 2,3-dihydroxynaphthalene               | -536.539653        | 3.6    | -536.384476                     | 3.5              |
| 2,2'-bipyridine <i>flat</i>            | -495.567323        | 0.0    | -495.409680                     | 0.0              |
| 2,2'-bipyridine <i>twisted</i>         | -495.557411        | 6.2    | -495.400135                     | 6.0              |
| 1,10-phenanthroline                    | -571.813563        |        | -571.643488                     |                  |

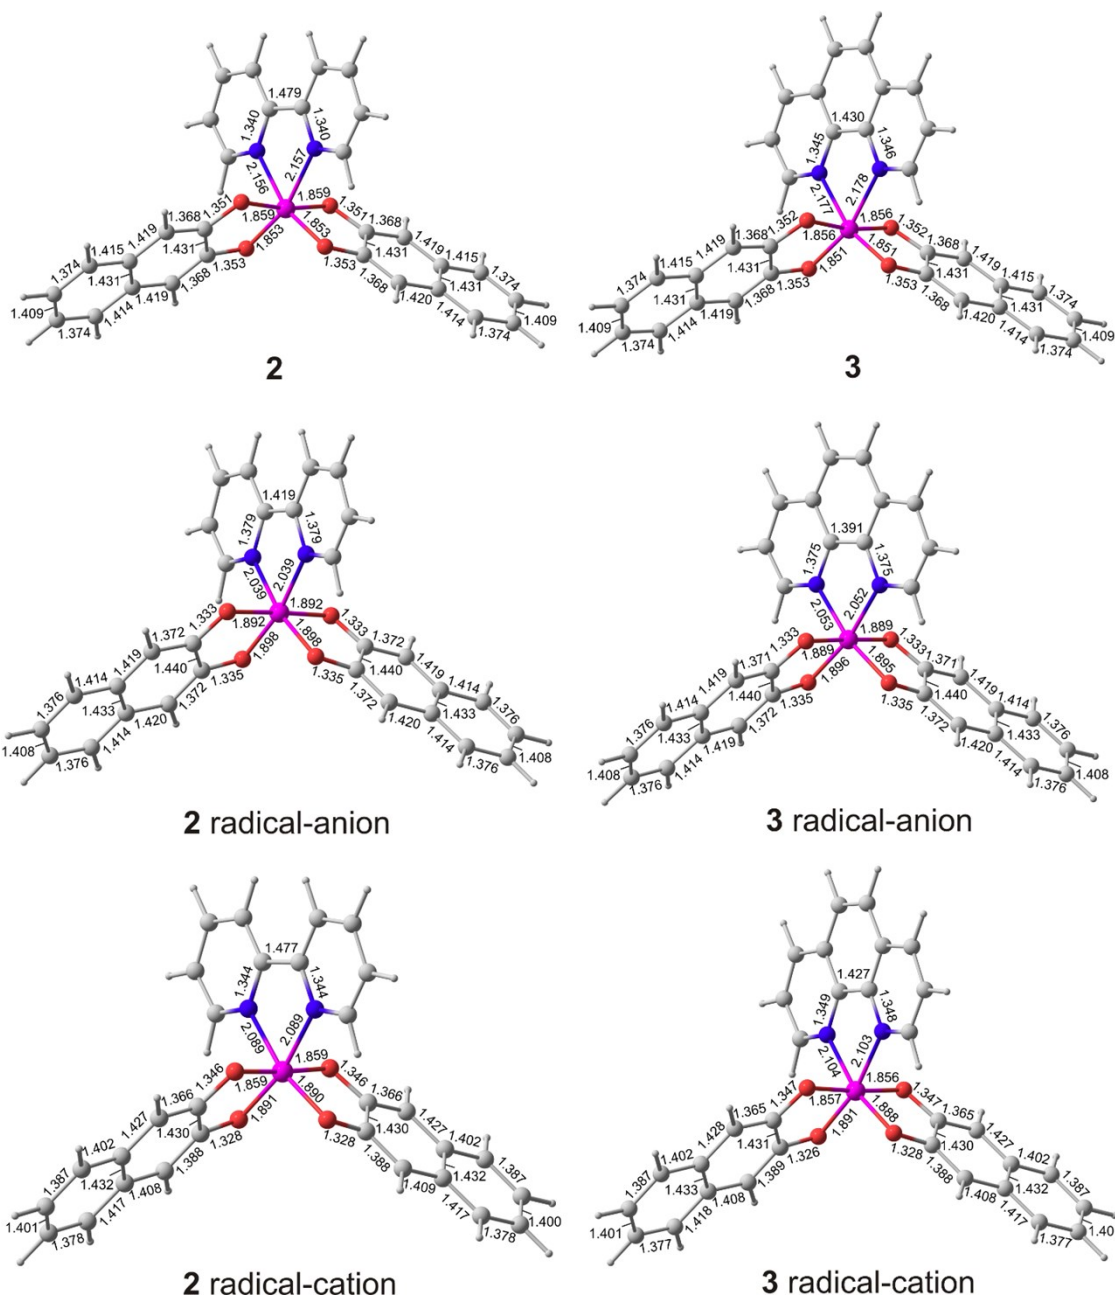

**Figure S1.** Bond lengths in **2**, **3** and their radical-anion and radical-cation forms calculated by DFT B3LYP/Def2TZVP method.

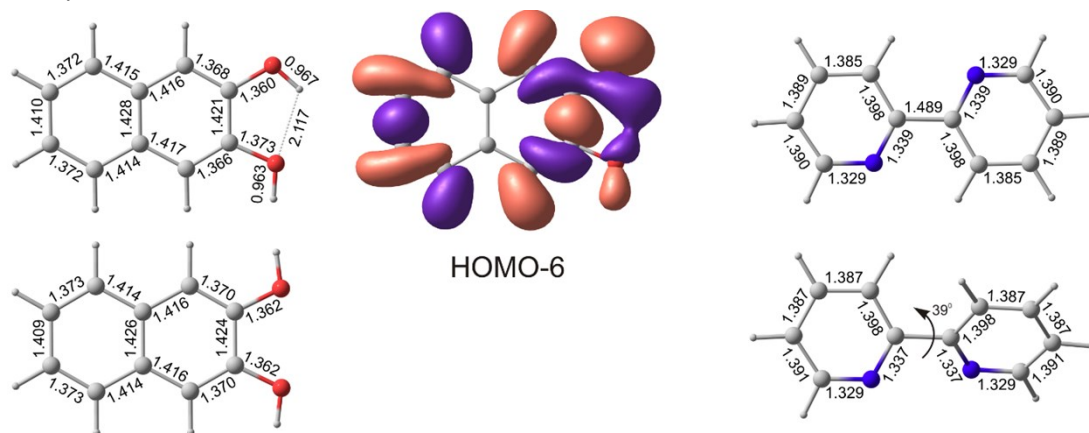

**Figure S2.** Geometry characteristics of 2,3-dihydroxynaphthalene and 2,2'-bipyridine molecules calculated by DFT B3LYP/Def2TZVP method.

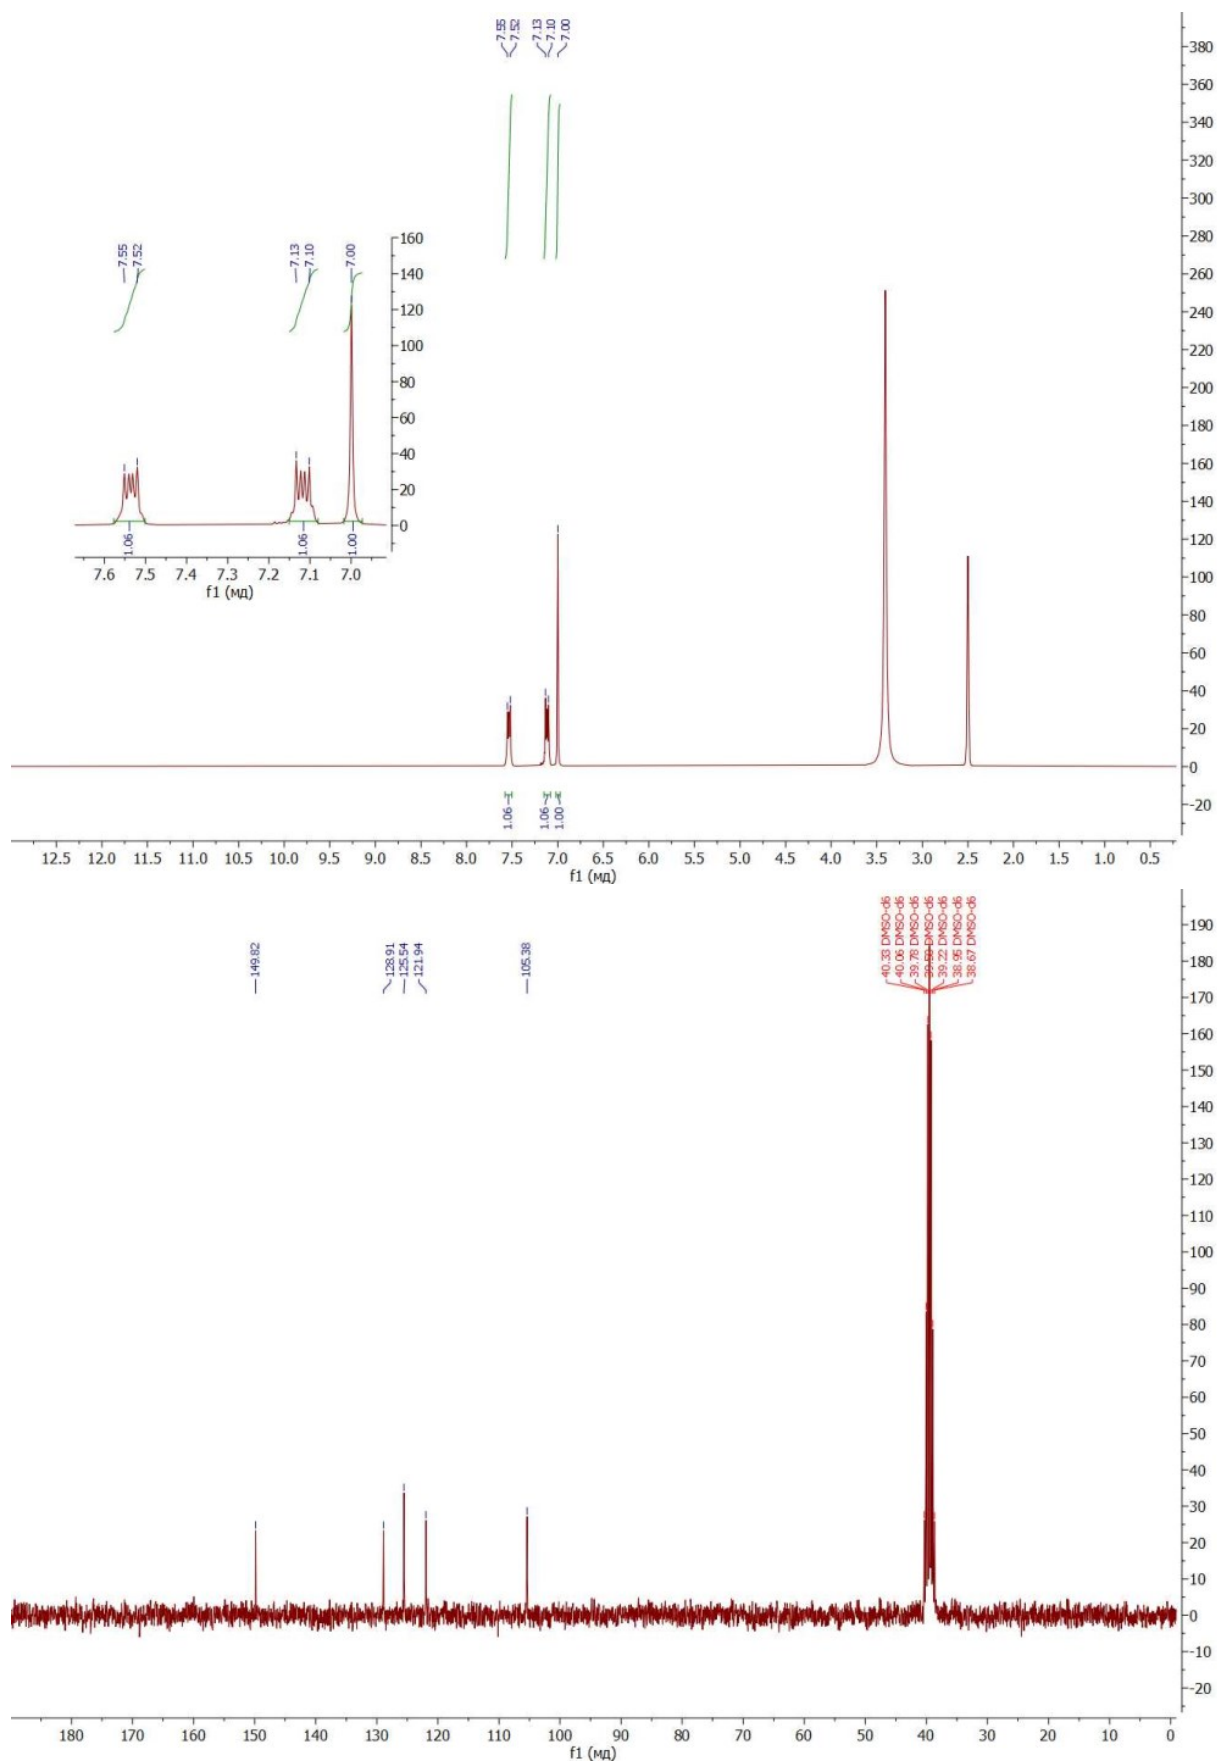

Figure S3. <sup>1</sup>H (top) and <sup>13</sup>C (bottom) NMR spectra of 1 in DMSO-d<sub>6</sub>.

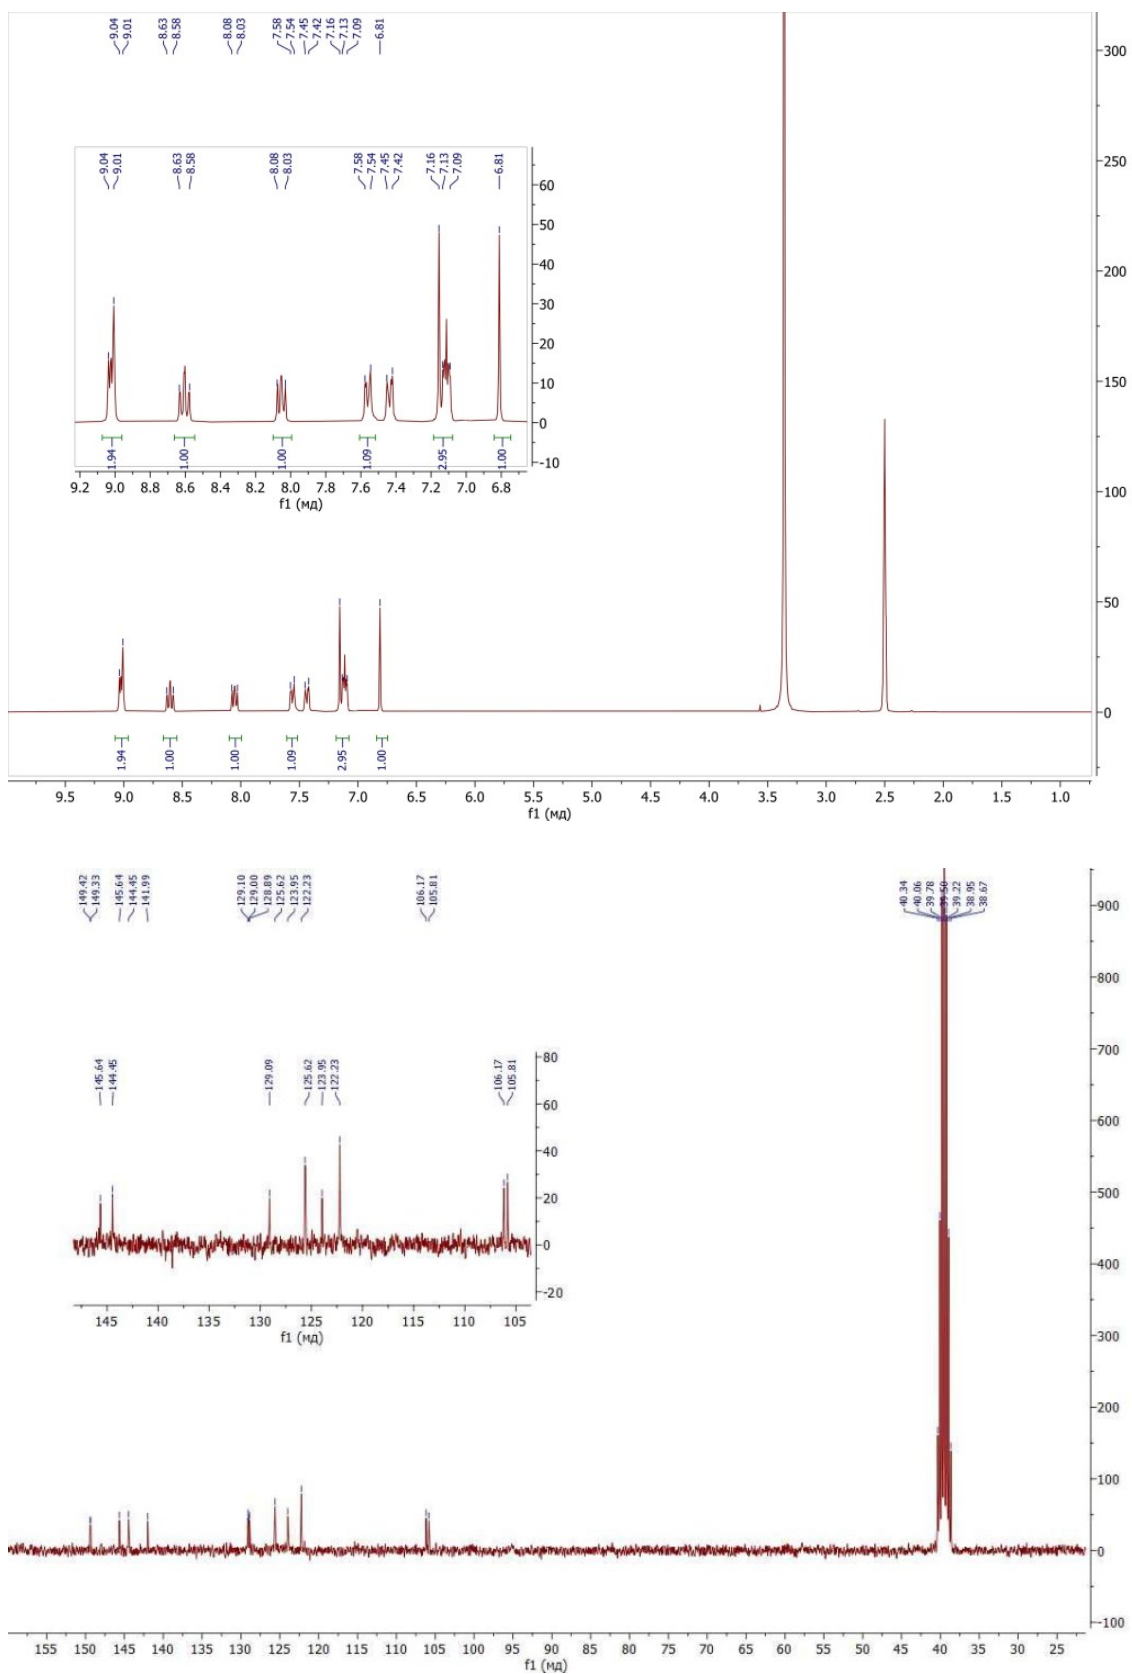

**Figure S4.** <sup>1</sup>H (top) and <sup>13</sup>C (bottom) NMR spectra of **2** in DMSO-d<sub>6</sub>. DEPT135 is shown in the inset.

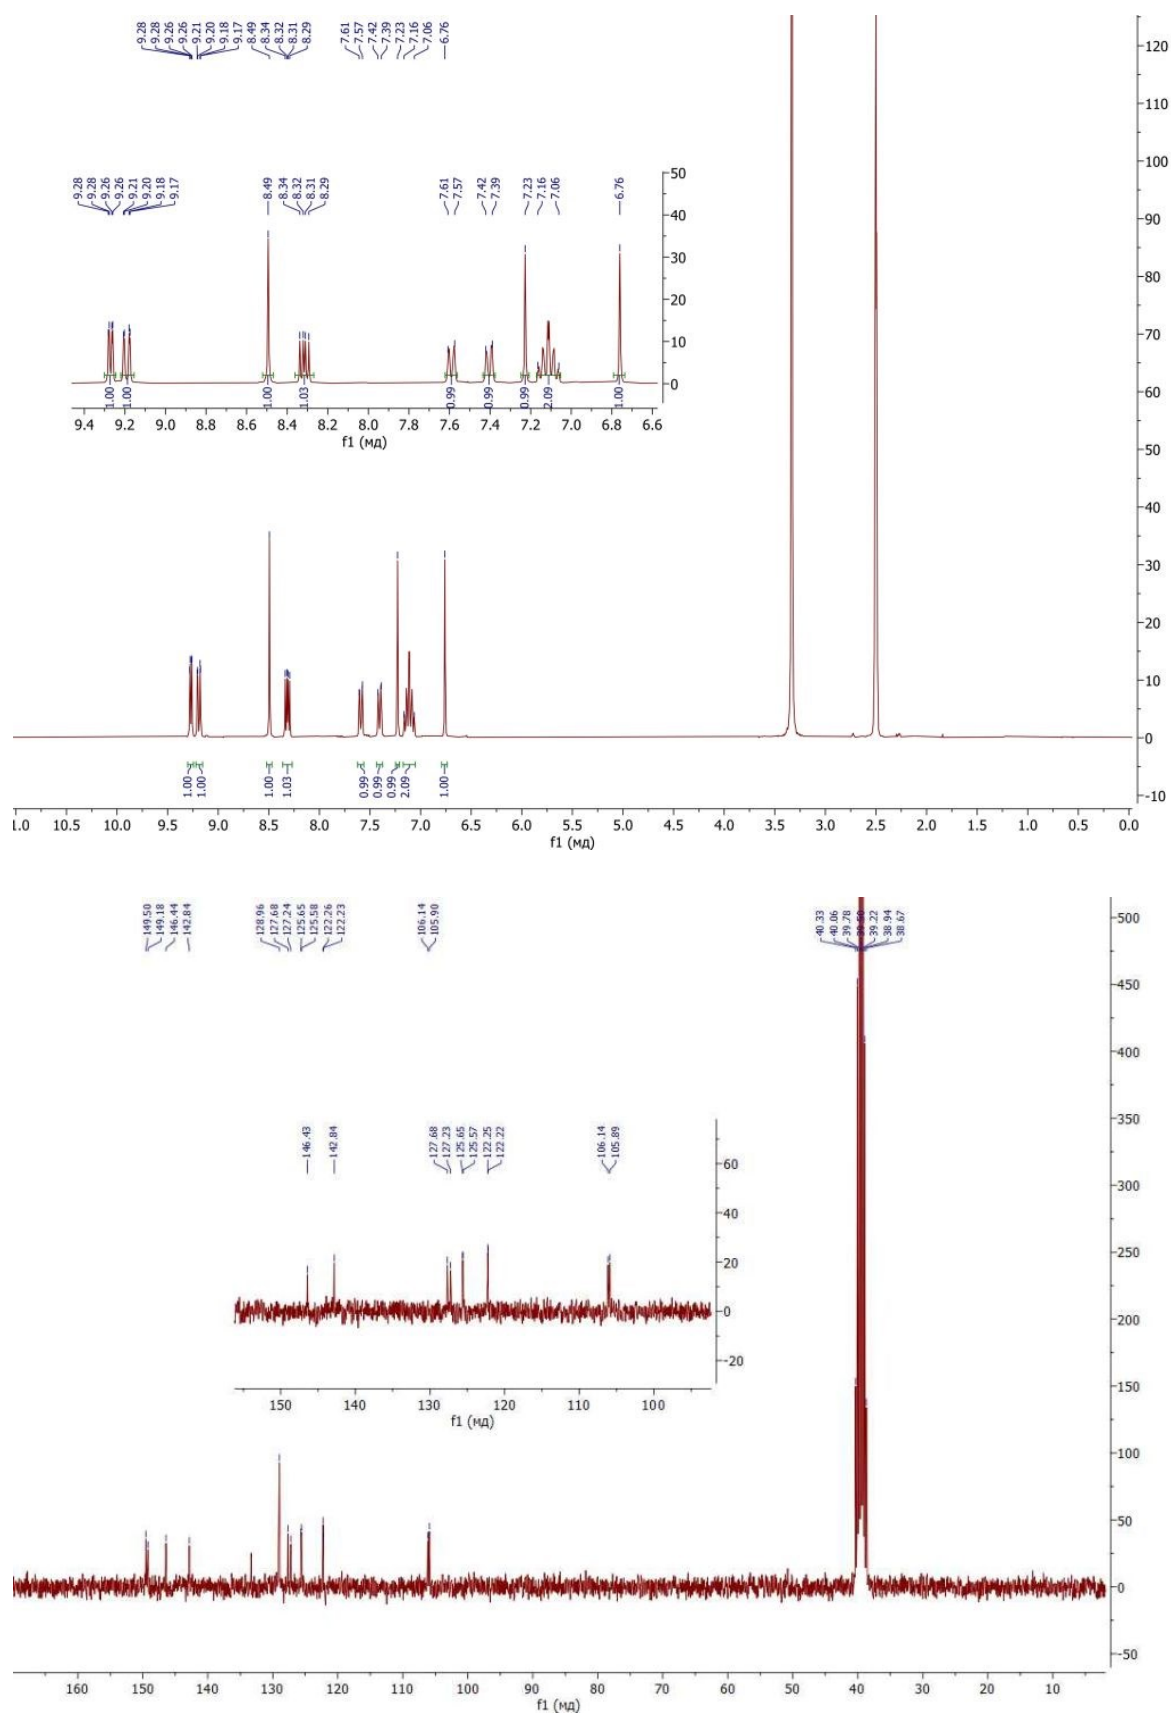

**Figure S5.** <sup>1</sup>H (*top*) and <sup>13</sup>C (*bottom*) NMR spectra of **3** in DMSO-d<sub>6</sub>. DEPT135 is shown in the inset (CH only).

Cartesian coordinates of the structures calculated by the DFT B3LYP/Def2TZVP

1  
32 0.000528000 0.002333000 0.004735000  
8 -1.114965000 -0.793301000 1.143851000  
8 -1.299808000 0.820786000 -0.897936000  
8 1.118764000 -1.034508000 -0.917494000  
8 1.297483000 1.016298000 0.686036000  
6 2.498057000 0.537801000 0.197477000  
6 3.707082000 1.080170000 0.514768000  
1 3.762390000 1.930601000 1.181773000  
6 4.887727000 0.518824000 -0.037507000  
6 6.168939000 1.042141000 0.257891000  
1 6.242599000 1.893673000 0.923954000  
6 7.300558000 0.487959000 -0.284226000  
1 8.272918000 0.900956000 -0.047504000  
6 7.203824000 -0.619915000 -1.150625000  
1 8.102527000 -1.050537000 -1.573696000  
6 5.977408000 -1.151887000 -1.457951000  
1 5.902425000 -2.003389000 -2.123900000  
6 4.789523000 -0.605342000 -0.916688000  
6 3.513088000 -1.143772000 -1.224380000  
1 3.420554000 -1.994020000 -1.887515000  
6 2.400058000 -0.579832000 -0.676424000  
6 -2.398461000 -0.416499000 0.799139000  
6 -3.509836000 -0.843135000 1.462191000  
1 -3.414518000 -1.512664000 2.307081000  
6 -4.788338000 -0.401131000 1.033194000  
6 -5.975057000 -0.812951000 1.684958000  
1 -5.897619000 -1.483208000 2.532853000  
6 -7.203399000 -0.376555000 1.258014000  
1 -8.101202000 -0.701462000 1.768380000  
6 -7.303268000 0.495462000 0.154834000  
1 -8.277121000 0.834613000 -0.174832000  
6 -6.172859000 0.913934000 -0.499843000  
1 -6.248981000 1.584276000 -1.347790000  
6 -4.889677000 0.483654000 -0.086310000  
6 -3.710337000 0.907288000 -0.752369000  
1 -3.768373000 1.576463000 -1.600922000  
6 -2.499081000 0.463092000 -0.313653000

2

|    |              |              |              |
|----|--------------|--------------|--------------|
| 32 | -0.000265000 | 0.169409000  | -0.001244000 |
| 8  | -1.021513000 | -0.961416000 | -1.055550000 |
| 8  | -1.447880000 | 0.307048000  | 1.156875000  |
| 8  | 1.447821000  | 0.306709000  | -1.158987000 |
| 8  | 1.018915000  | -0.964998000 | 1.051153000  |
| 7  | 0.705938000  | 1.882445000  | 1.101858000  |
| 7  | -0.704134000 | 1.885529000  | -1.101894000 |
| 6  | 1.401558000  | 1.749601000  | 2.230024000  |
| 1  | 1.593895000  | 0.732856000  | 2.543587000  |
| 6  | 1.840861000  | 2.853584000  | 2.945912000  |
| 1  | 2.406848000  | 2.713914000  | 3.855880000  |
| 6  | 1.537796000  | 4.119052000  | 2.466518000  |
| 1  | 1.865503000  | 5.002558000  | 2.998624000  |
| 6  | 0.804922000  | 4.245748000  | 1.294913000  |
| 6  | -0.802225000 | 4.249409000  | -1.288710000 |
| 6  | -1.536229000 | 4.125994000  | -2.460026000 |
| 1  | -1.863800000 | 5.011036000  | -2.989632000 |
| 6  | -1.840319000 | 2.861993000  | -2.942346000 |
| 1  | -2.407198000 | 2.724839000  | -3.852135000 |
| 6  | -1.400752000 | 1.755930000  | -2.229694000 |
| 1  | -1.593611000 | 0.740068000  | -2.545826000 |
| 6  | -0.393903000 | 3.098664000  | -0.623402000 |
| 6  | 0.396465000  | 3.096806000  | 0.626431000  |
| 6  | 2.229955000  | -1.177776000 | 0.486704000  |
| 6  | 3.190884000  | -1.994301000 | 1.016853000  |
| 1  | 2.990116000  | -2.535635000 | 1.933354000  |
| 6  | 4.440061000  | -2.143590000 | 0.359618000  |
| 6  | 5.460333000  | -2.980159000 | 0.869476000  |
| 1  | 5.274581000  | -3.524091000 | 1.788820000  |
| 6  | 6.663623000  | -3.112944000 | 0.220549000  |
| 1  | 7.430877000  | -3.760213000 | 0.627036000  |
| 6  | 6.901902000  | -2.410009000 | -0.976870000 |
| 1  | 7.851483000  | -2.519886000 | -1.486013000 |
| 6  | 5.931700000  | -1.590069000 | -1.499576000 |
| 1  | 6.113553000  | -1.051541000 | -2.422894000 |
| 6  | 4.681616000  | -1.430272000 | -0.857174000 |
| 6  | 3.666435000  | -0.589661000 | -1.383895000 |
| 1  | 3.833248000  | -0.049228000 | -2.307660000 |
| 6  | 2.469674000  | -0.467892000 | -0.732568000 |
| 6  | -2.231773000 | -1.175429000 | -0.489854000 |
| 6  | -3.193325000 | -1.991036000 | -1.020113000 |
| 1  | -2.994337000 | -2.530149000 | -1.938295000 |

|   |              |              |              |
|---|--------------|--------------|--------------|
| 6 | -4.441616000 | -2.141760000 | -0.361225000 |
| 6 | -5.462061000 | -2.978302000 | -0.870757000 |
| 1 | -5.277435000 | -3.520535000 | -1.791285000 |
| 6 | -6.664119000 | -3.113086000 | -0.220014000 |
| 1 | -7.431488000 | -3.760546000 | -0.625970000 |
| 6 | -6.900930000 | -2.412130000 | 0.978913000  |
| 1 | -7.849620000 | -2.523527000 | 1.489380000  |
| 6 | -5.930582000 | -1.592209000 | 1.501256000  |
| 1 | -6.111237000 | -1.055203000 | 2.425711000  |
| 6 | -4.681550000 | -1.430504000 | 0.856963000  |
| 6 | -3.665959000 | -0.590269000 | 1.383537000  |
| 1 | -3.831980000 | -0.050551000 | 2.307816000  |
| 6 | -2.470119000 | -0.467314000 | 0.730809000  |
| 1 | -0.552124000 | 5.227204000  | -0.905389000 |
| 1 | 0.555885000  | 5.224567000  | 0.913526000  |

## 2 radical-anion

|    |              |              |              |
|----|--------------|--------------|--------------|
| 32 | 0.000324000  | 0.458020000  | 0.000101000  |
| 8  | -0.946273000 | -0.797829000 | -1.061957000 |
| 8  | -1.510391000 | 0.425659000  | 1.138370000  |
| 8  | 1.510909000  | 0.426120000  | -1.138369000 |
| 8  | 0.948442000  | -0.795611000 | 1.063362000  |
| 7  | 0.670443000  | 2.032170000  | 1.109337000  |
| 7  | -0.671638000 | 2.030348000  | -1.110466000 |
| 6  | 1.333221000  | 1.911137000  | 2.269345000  |
| 1  | 1.514877000  | 0.894603000  | 2.589339000  |
| 6  | 1.751368000  | 2.997443000  | 3.000328000  |
| 1  | 2.286762000  | 2.851767000  | 3.927188000  |
| 6  | 1.462773000  | 4.291114000  | 2.502444000  |
| 1  | 1.779285000  | 5.170667000  | 3.049488000  |
| 6  | 0.776858000  | 4.425562000  | 1.325345000  |
| 6  | -0.783147000 | 4.423391000  | -1.327418000 |
| 6  | -1.469267000 | 4.286945000  | -2.504168000 |
| 1  | -1.787999000 | 5.165581000  | -3.051381000 |
| 6  | -1.755370000 | 2.992490000  | -3.001423000 |
| 1  | -2.290680000 | 2.845363000  | -3.928103000 |
| 6  | -1.334658000 | 1.907387000  | -2.270143000 |
| 1  | -1.514152000 | 0.890318000  | -2.589633000 |
| 6  | -0.365907000 | 3.278183000  | -0.609594000 |
| 6  | 0.362352000  | 3.279123000  | 0.607876000  |
| 6  | 2.114987000  | -1.129324000 | 0.506667000  |
| 6  | 2.991626000  | -2.045346000 | 1.029909000  |
| 1  | 2.737469000  | -2.560527000 | 1.948962000  |



|   |              |              |              |
|---|--------------|--------------|--------------|
| 6 | 4.219278000  | -2.325579000 | 0.374682000  |
| 6 | 5.148423000  | -3.263354000 | 0.880594000  |
| 1 | 4.905991000  | -3.785779000 | 1.800115000  |
| 6 | 6.335926000  | -3.521678000 | 0.234518000  |
| 1 | 7.030748000  | -4.246151000 | 0.643391000  |
| 6 | 6.647857000  | -2.844297000 | -0.959447000 |
| 1 | 7.582906000  | -3.047581000 | -1.468576000 |
| 6 | 5.764475000  | -1.925972000 | -1.479355000 |
| 1 | 6.003255000  | -1.404463000 | -2.400401000 |
| 6 | 4.535935000  | -1.637359000 | -0.841813000 |
| 6 | 3.613503000  | -0.695155000 | -1.366085000 |
| 1 | 3.839206000  | -0.169553000 | -2.286522000 |
| 6 | 2.430730000  | -0.442457000 | -0.719137000 |
| 6 | -2.112984000 | -1.131459000 | -0.505588000 |
| 6 | -2.988923000 | -2.048432000 | -1.028355000 |
| 1 | -2.734154000 | -2.564329000 | -1.946833000 |
| 6 | -4.216833000 | -2.328528000 | -0.373523000 |
| 6 | -5.145251000 | -3.267278000 | -0.878972000 |
| 1 | -4.902011000 | -3.790608000 | -1.797756000 |
| 6 | -6.333088000 | -3.525308000 | -0.233406000 |
| 1 | -7.027324000 | -4.250596000 | -0.641826000 |
| 6 | -6.646097000 | -2.846690000 | 0.959604000  |
| 1 | -7.581442000 | -3.049740000 | 1.468295000  |
| 6 | -5.763421000 | -1.927438000 | 1.479047000  |
| 1 | -6.003034000 | -1.404871000 | 2.399275000  |
| 6 | -4.534553000 | -1.639114000 | 0.842000000  |
| 6 | -3.612768000 | -0.696063000 | 1.365892000  |
| 1 | -3.839220000 | -0.169564000 | 2.285620000  |
| 6 | -2.429676000 | -0.443627000 | 0.719426000  |
| 1 | -0.553430000 | 5.406554000  | -0.940881000 |
| 1 | 0.545259000  | 5.408027000  | 0.938163000  |

## 2 radical-cation

|    |              |              |              |
|----|--------------|--------------|--------------|
| 32 | -0.000269000 | 0.455065000  | -0.000083000 |
| 8  | -0.929372000 | -0.788765000 | -1.077433000 |
| 8  | -1.518674000 | 0.500880000  | 1.071578000  |
| 8  | 1.519298000  | 0.501948000  | -1.070259000 |
| 8  | 0.929825000  | -0.789217000 | 1.077570000  |
| 7  | 0.618170000  | 2.085178000  | 1.151056000  |
| 7  | -0.618351000 | 2.085082000  | -1.150625000 |
| 6  | 1.209861000  | 1.949306000  | 2.339683000  |
| 1  | 1.379916000  | 0.934888000  | 2.671341000  |
| 6  | 1.573726000  | 3.051741000  | 3.096074000  |

|   |              |              |              |
|---|--------------|--------------|--------------|
| 1 | 2.052757000  | 2.911346000  | 4.054381000  |
| 6 | 1.306316000  | 4.318295000  | 2.596817000  |
| 1 | 1.577123000  | 5.200431000  | 3.161655000  |
| 6 | 0.680235000  | 4.447992000  | 1.364628000  |
| 6 | -0.679282000 | 4.447856000  | -1.365048000 |
| 6 | -1.304993000 | 4.318045000  | -2.597346000 |
| 1 | -1.575262000 | 5.200056000  | -3.162641000 |
| 6 | -1.573102000 | 3.051377000  | -3.096162000 |
| 1 | -2.052042000 | 2.910971000  | -4.054512000 |
| 6 | -1.210140000 | 1.949052000  | -2.339344000 |
| 1 | -1.380791000 | 0.934543000  | -2.670389000 |
| 6 | -0.340031000 | 3.302903000  | -0.655506000 |
| 6 | 0.340442000  | 3.303024000  | 0.655481000  |
| 6 | 2.088814000  | -1.120127000 | 0.520683000  |
| 6 | 2.936396000  | -2.092655000 | 1.033698000  |
| 1 | 2.646942000  | -2.629200000 | 1.928386000  |
| 6 | 4.155899000  | -2.374150000 | 0.387942000  |
| 6 | 5.048760000  | -3.359040000 | 0.879353000  |
| 1 | 4.780509000  | -3.904540000 | 1.775948000  |
| 6 | 6.236277000  | -3.625804000 | 0.233876000  |
| 1 | 6.907569000  | -4.381122000 | 0.619844000  |
| 6 | 6.572360000  | -2.916213000 | -0.925919000 |
| 1 | 7.504778000  | -3.125643000 | -1.433818000 |
| 6 | 5.718380000  | -1.946673000 | -1.431332000 |
| 1 | 5.989566000  | -1.407148000 | -2.330613000 |
| 6 | 4.502609000  | -1.651609000 | -0.798912000 |
| 6 | 3.609125000  | -0.662537000 | -1.309712000 |
| 1 | 3.864199000  | -0.121068000 | -2.211742000 |
| 6 | 2.430888000  | -0.404044000 | -0.669141000 |
| 6 | -2.088892000 | -1.119868000 | -0.520415000 |
| 6 | -2.936617000 | -2.091566000 | -1.033962000 |
| 1 | -2.647368000 | -2.627761000 | -1.928930000 |
| 6 | -4.156479000 | -2.373220000 | -0.388215000 |
| 6 | -5.049636000 | -3.357198000 | -0.880294000 |
| 1 | -4.781762000 | -3.902109000 | -1.777373000 |
| 6 | -6.237352000 | -3.624114000 | -0.234762000 |
| 1 | -6.908978000 | -4.378766000 | -0.621447000 |
| 6 | -6.572975000 | -2.915588000 | 0.925546000  |
| 1 | -7.505371000 | -3.125087000 | 1.433417000  |
| 6 | -5.718443000 | -1.946846000 | 1.431634000  |
| 1 | -5.989035000 | -1.408148000 | 2.331592000  |
| 6 | -4.502683000 | -1.651655000 | 0.799076000  |
| 6 | -3.608833000 | -0.663284000 | 1.310379000  |

|   |              |              |              |
|---|--------------|--------------|--------------|
| 1 | -3.863494000 | -0.122328000 | 2.212838000  |
| 6 | -2.430504000 | -0.404614000 | 0.669632000  |
| 1 | -0.456448000 | 5.427578000  | -0.970363000 |
| 1 | 0.457686000  | 5.427729000  | 0.969818000  |

### 3

|    |              |              |              |
|----|--------------|--------------|--------------|
| 32 | -0.001654000 | -0.124179000 | 0.000471000  |
| 8  | -1.037343000 | -1.241328000 | -1.050697000 |
| 8  | -1.436960000 | 0.028156000  | 1.167546000  |
| 8  | 1.434227000  | 0.027158000  | -1.166337000 |
| 8  | 1.031247000  | -1.246534000 | 1.049081000  |
| 7  | 0.737281000  | 1.599276000  | 1.107199000  |
| 7  | -0.735100000 | 1.603865000  | -1.104270000 |
| 6  | 1.460428000  | 1.534391000  | 2.210326000  |
| 1  | 1.687708000  | 0.540857000  | 2.573015000  |
| 6  | 1.900932000  | 2.693515000  | 2.866153000  |
| 1  | 2.494023000  | 2.598664000  | 3.764801000  |
| 6  | 1.573189000  | 3.928065000  | 2.355574000  |
| 1  | 1.905090000  | 4.834843000  | 2.846252000  |
| 6  | 0.797148000  | 4.013232000  | 1.183134000  |
| 6  | 0.390583000  | 5.239904000  | 0.565964000  |
| 1  | 0.696773000  | 6.173688000  | 1.020575000  |
| 6  | -0.362533000 | 5.242255000  | -0.564822000 |
| 1  | -0.661952000 | 6.177947000  | -1.020045000 |
| 6  | -0.777902000 | 4.018138000  | -1.181244000 |
| 6  | -1.555192000 | 3.937978000  | -2.353306000 |
| 1  | -1.880452000 | 4.846965000  | -2.844320000 |
| 6  | -1.892090000 | 2.705619000  | -2.863005000 |
| 1  | -2.486616000 | 2.614316000  | -3.761069000 |
| 6  | -1.459129000 | 1.543650000  | -2.206894000 |
| 1  | -1.693197000 | 0.551633000  | -2.569493000 |
| 6  | -0.391804000 | 2.800405000  | -0.593524000 |
| 6  | 0.402423000  | 2.797841000  | 0.595984000  |
| 6  | 2.244905000  | -1.438787000 | 0.483514000  |
| 6  | 3.221231000  | -2.236792000 | 1.013956000  |
| 1  | 3.031429000  | -2.779738000 | 1.931832000  |
| 6  | 4.471798000  | -2.365528000 | 0.355019000  |
| 6  | 5.507362000  | -3.183027000 | 0.865023000  |
| 1  | 5.332667000  | -3.728035000 | 1.785898000  |
| 6  | 6.711607000  | -3.296441000 | 0.214197000  |
| 1  | 7.490605000  | -3.929474000 | 0.620778000  |
| 6  | 6.935676000  | -2.592277000 | -0.985232000 |
| 1  | 7.886093000  | -2.686963000 | -1.495849000 |

|   |              |              |              |
|---|--------------|--------------|--------------|
| 6 | 5.950510000  | -1.790483000 | -1.508101000 |
| 1 | 6.121261000  | -1.251006000 | -2.432980000 |
| 6 | 4.698976000  | -1.651022000 | -0.863863000 |
| 6 | 3.668361000  | -0.829447000 | -1.390760000 |
| 1 | 3.823975000  | -0.288351000 | -2.316075000 |
| 6 | 2.470715000  | -0.727649000 | -0.737913000 |
| 6 | -2.251198000 | -1.432605000 | -0.485150000 |
| 6 | -3.229399000 | -2.227065000 | -1.017263000 |
| 1 | -3.041719000 | -2.767380000 | -1.937108000 |
| 6 | -4.479999000 | -2.354932000 | -0.357936000 |
| 6 | -5.517253000 | -3.169378000 | -0.869377000 |
| 1 | -5.344073000 | -3.712194000 | -1.791787000 |
| 6 | -6.721246000 | -3.282395000 | -0.218066000 |
| 1 | -7.501552000 | -3.913285000 | -0.625456000 |
| 6 | -6.943316000 | -2.580800000 | 0.983308000  |
| 1 | -7.893614000 | -2.675126000 | 1.494222000  |
| 6 | -5.956450000 | -1.782111000 | 1.507607000  |
| 1 | -6.125618000 | -1.244546000 | 2.433897000  |
| 6 | -4.704978000 | -1.643214000 | 0.862852000  |
| 6 | -3.672556000 | -0.824866000 | 1.391275000  |
| 1 | -3.827019000 | -0.285054000 | 2.317490000  |
| 6 | -2.475051000 | -0.723781000 | 0.738087000  |

### 3 radical-anion

|    |              |              |              |
|----|--------------|--------------|--------------|
| 32 | -0.000930000 | 0.176327000  | 0.002288000  |
| 8  | -0.958438000 | -1.065338000 | -1.062382000 |
| 8  | -1.504062000 | 0.153189000  | 1.146583000  |
| 8  | 1.502717000  | 0.152288000  | -1.141509000 |
| 8  | 0.955940000  | -1.065921000 | 1.067267000  |
| 7  | 0.690521000  | 1.754872000  | 1.118664000  |
| 7  | -0.689498000 | 1.755503000  | -1.112787000 |
| 6  | 1.373901000  | 1.701228000  | 2.268187000  |
| 1  | 1.586331000  | 0.707674000  | 2.638255000  |
| 6  | 1.781085000  | 2.839860000  | 2.939257000  |
| 1  | 2.334555000  | 2.739102000  | 3.862047000  |
| 6  | 1.472815000  | 4.108891000  | 2.411046000  |
| 1  | 1.787320000  | 5.010954000  | 2.922166000  |
| 6  | 0.756827000  | 4.196573000  | 1.224521000  |
| 6  | 0.367887000  | 5.418821000  | 0.575792000  |
| 1  | 0.653054000  | 6.357124000  | 1.038244000  |
| 6  | -0.337385000 | 5.419077000  | -0.585055000 |
| 1  | -0.614994000 | 6.357619000  | -1.051630000 |
| 6  | -0.736174000 | 4.197243000  | -1.228856000 |

|   |              |              |              |
|---|--------------|--------------|--------------|
| 6 | -1.451578000 | 4.110729000  | -2.415796000 |
| 1 | -1.757878000 | 5.013146000  | -2.931182000 |
| 6 | -1.769172000 | 2.841660000  | -2.939319000 |
| 1 | -2.322457000 | 2.741600000  | -3.862313000 |
| 6 | -1.371568000 | 1.702765000  | -2.263771000 |
| 1 | -1.590648000 | 0.709445000  | -2.630493000 |
| 6 | -0.359325000 | 2.984637000  | -0.592012000 |
| 6 | 0.369299000  | 2.984338000  | 0.593160000  |
| 6 | 2.123801000  | -1.392232000 | 0.508587000  |
| 6 | 3.009214000  | -2.299489000 | 1.032420000  |
| 1 | 2.761760000  | -2.813332000 | 1.954028000  |
| 6 | 4.236783000  | -2.572864000 | 0.374246000  |
| 6 | 5.174477000  | -3.501971000 | 0.880489000  |
| 1 | 4.938987000  | -4.022811000 | 1.802688000  |
| 6 | 6.361556000  | -3.754003000 | 0.231269000  |
| 1 | 7.063021000  | -4.471889000 | 0.640347000  |
| 6 | 6.664509000  | -3.078885000 | -0.966328000 |
| 1 | 7.599278000  | -3.277291000 | -1.477855000 |
| 6 | 5.772786000  | -2.168902000 | -1.486573000 |
| 1 | 6.004514000  | -1.649223000 | -2.410424000 |
| 6 | 4.544367000  | -1.886988000 | -0.845837000 |
| 6 | 3.613168000  | -0.953713000 | -1.370625000 |
| 1 | 3.831675000  | -0.430017000 | -2.293857000 |
| 6 | 2.430771000  | -0.707781000 | -0.720737000 |
| 6 | -2.128513000 | -1.387521000 | -0.505826000 |
| 6 | -3.016584000 | -2.290828000 | -1.031897000 |
| 1 | -2.769873000 | -2.804546000 | -1.953776000 |
| 6 | -4.246198000 | -2.560193000 | -0.375781000 |
| 6 | -5.186522000 | -3.485412000 | -0.884221000 |
| 1 | -4.951624000 | -4.006202000 | -1.806588000 |
| 6 | -6.375394000 | -3.733789000 | -0.236856000 |
| 1 | -7.078877000 | -4.448775000 | -0.647535000 |
| 6 | -6.677540000 | -3.058692000 | 0.960957000  |
| 1 | -7.613703000 | -3.254214000 | 1.471046000  |
| 6 | -5.783206000 | -2.152513000 | 1.483360000  |
| 1 | -6.014318000 | -1.632886000 | 2.407402000  |
| 6 | -4.552885000 | -1.874421000 | 0.844564000  |
| 6 | -3.619046000 | -0.945000000 | 1.371498000  |
| 1 | -3.837109000 | -0.421112000 | 2.294722000  |
| 6 | -2.434771000 | -0.702831000 | 0.723583000  |

**3 radical-cation**

|    |              |             |              |
|----|--------------|-------------|--------------|
| 32 | -0.002331000 | 0.174153000 | -0.001032000 |
|----|--------------|-------------|--------------|

|   |              |              |              |
|---|--------------|--------------|--------------|
| 8 | -0.942137000 | -1.059546000 | -1.077489000 |
| 8 | -1.512645000 | 0.232546000  | 1.076733000  |
| 8 | 1.511228000  | 0.228526000  | -1.075752000 |
| 8 | 0.934904000  | -1.068026000 | 1.073688000  |
| 7 | 0.645064000  | 1.804885000  | 1.160915000  |
| 7 | -0.638724000 | 1.810393000  | -1.159244000 |
| 6 | 1.259773000  | 1.736783000  | 2.331126000  |
| 1 | 1.456098000  | 0.745571000  | 2.716038000  |
| 6 | 1.628479000  | 2.894261000  | 3.028617000  |
| 1 | 2.130537000  | 2.798094000  | 3.980722000  |
| 6 | 1.347566000  | 4.130883000  | 2.492785000  |
| 1 | 1.628515000  | 5.035245000  | 3.017902000  |
| 6 | 0.685383000  | 4.220068000  | 1.252361000  |
| 6 | 0.337043000  | 5.447398000  | 0.601077000  |
| 1 | 0.597363000  | 6.380780000  | 1.083262000  |
| 6 | -0.304690000 | 5.450092000  | -0.596726000 |
| 1 | -0.558487000 | 6.385636000  | -1.078178000 |
| 6 | -0.661642000 | 4.225806000  | -1.248999000 |
| 6 | -1.323717000 | 4.142134000  | -2.489851000 |
| 1 | -1.598014000 | 5.048746000  | -3.014633000 |
| 6 | -1.613182000 | 2.907918000  | -3.026692000 |
| 1 | -2.115258000 | 2.816122000  | -3.979216000 |
| 6 | -1.253466000 | 1.747352000  | -2.329776000 |
| 1 | -1.457173000 | 0.757720000  | -2.714962000 |
| 6 | -0.335176000 | 3.010491000  | -0.624491000 |
| 6 | 0.349922000  | 3.007648000  | 0.627145000  |
| 6 | 2.095263000  | -1.388214000 | 0.516762000  |
| 6 | 2.951403000  | -2.354787000 | 1.028949000  |
| 1 | 2.666058000  | -2.893883000 | 1.923386000  |
| 6 | 4.171898000  | -2.626214000 | 0.382425000  |
| 6 | 5.072318000  | -3.606073000 | 0.872000000  |
| 1 | 4.808487000  | -4.154015000 | 1.768368000  |
| 6 | 6.259997000  | -3.864240000 | 0.224893000  |
| 1 | 6.936770000  | -4.615860000 | 0.608476000  |
| 6 | 6.589874000  | -3.150616000 | -0.934944000 |
| 1 | 7.522945000  | -3.353585000 | -1.444293000 |
| 6 | 5.729454000  | -2.186122000 | -1.438257000 |
| 1 | 5.996240000  | -1.643883000 | -2.337197000 |
| 6 | 4.512410000  | -1.899784000 | -0.804433000 |
| 6 | 3.611282000  | -0.916832000 | -1.314130000 |
| 1 | 3.862000000  | -0.373088000 | -2.215972000 |
| 6 | 2.431550000  | -0.668450000 | -0.673747000 |
| 6 | -2.103726000 | -1.379201000 | -0.518620000 |

|   |              |              |              |
|---|--------------|--------------|--------------|
| 6 | -2.962483000 | -2.341636000 | -1.031504000 |
| 1 | -2.679956000 | -2.880186000 | -1.927193000 |
| 6 | -4.183747000 | -2.611119000 | -0.383900000 |
| 6 | -5.087972000 | -3.585924000 | -0.875161000 |
| 1 | -4.827057000 | -4.132562000 | -1.773228000 |
| 6 | -6.276508000 | -3.841486000 | -0.227704000 |
| 1 | -6.956477000 | -4.589197000 | -0.613313000 |
| 6 | -6.602827000 | -3.130336000 | 0.934208000  |
| 1 | -7.536170000 | -3.331265000 | 1.443831000  |
| 6 | -5.738113000 | -2.170664000 | 1.439331000  |
| 1 | -6.001800000 | -1.629859000 | 2.340062000  |
| 6 | -4.520527000 | -1.887091000 | 0.804867000  |
| 6 | -3.615391000 | -0.908608000 | 1.315696000  |
| 1 | -3.862440000 | -0.366390000 | 2.219477000  |
| 6 | -2.435910000 | -0.662100000 | 0.673450000  |

2,3-dihydroxynaphthalene *H-bond*

|   |              |              |              |
|---|--------------|--------------|--------------|
| 8 | -2.964567000 | 1.253858000  | 0.000065000  |
| 8 | -2.895517000 | -1.406514000 | 0.000421000  |
| 6 | -1.713322000 | -0.734109000 | 0.000225000  |
| 6 | -0.524969000 | -1.411539000 | 0.000055000  |
| 1 | -0.539852000 | -2.494107000 | 0.000144000  |
| 6 | 0.708755000  | -0.716474000 | -0.000122000 |
| 6 | 1.953094000  | -1.390935000 | -0.000266000 |
| 1 | 1.957858000  | -2.474576000 | -0.000277000 |
| 6 | 3.134796000  | -0.693579000 | -0.000395000 |
| 1 | 4.077769000  | -1.225660000 | -0.000505000 |
| 6 | 3.128440000  | 0.716200000  | -0.000385000 |
| 1 | 4.065960000  | 1.257737000  | -0.000488000 |
| 6 | 1.939071000  | 1.400802000  | -0.000244000 |
| 1 | 1.933122000  | 2.484763000  | -0.000241000 |
| 6 | 0.704276000  | 0.711469000  | -0.000108000 |
| 6 | -0.541045000 | 1.388510000  | -0.000048000 |
| 1 | -0.556574000 | 2.473670000  | -0.000230000 |
| 6 | -1.713553000 | 0.687307000  | 0.000156000  |
| 1 | -2.895875000 | 2.214570000  | 0.003279000  |
| 1 | -3.614993000 | -0.761062000 | 0.001224000  |

2,3-dihydroxynaphthalene

|   |             |              |              |
|---|-------------|--------------|--------------|
| 8 | 2.951581000 | -1.315273000 | -0.000675000 |
| 8 | 2.951604000 | 1.315275000  | -0.000160000 |
| 6 | 1.730139000 | 0.712140000  | 0.000169000  |
| 6 | 0.541145000 | 1.391958000  | 0.000163000  |

|   |              |              |              |
|---|--------------|--------------|--------------|
| 1 | 0.548103000  | 2.477428000  | 0.000720000  |
| 6 | -0.701987000 | 0.713017000  | 0.000171000  |
| 6 | -1.940478000 | 1.395827000  | 0.000170000  |
| 1 | -1.940220000 | 2.479718000  | 0.000346000  |
| 6 | -3.126479000 | 0.704737000  | 0.000039000  |
| 1 | -4.066763000 | 1.241491000  | 0.000052000  |
| 6 | -3.126494000 | -0.704696000 | -0.000143000 |
| 1 | -4.066791000 | -1.241428000 | -0.000259000 |
| 6 | -1.940508000 | -1.395813000 | -0.000215000 |
| 1 | -1.940269000 | -2.479703000 | -0.000298000 |
| 6 | -0.702003000 | -0.713031000 | 0.000008000  |
| 6 | 0.541121000  | -1.391990000 | -0.000218000 |
| 1 | 0.548090000  | -2.477456000 | -0.000953000 |
| 6 | 1.730109000  | -0.712165000 | 0.000269000  |
| 1 | 2.832445000  | -2.271965000 | 0.006472000  |
| 1 | 2.832540000  | 2.272003000  | -0.001884000 |

*2,2'-bipyridine flat*

|   |              |              |              |
|---|--------------|--------------|--------------|
| 7 | 1.158064000  | 1.383252000  | 0.000510000  |
| 7 | -1.158064000 | -1.383252000 | 0.000510000  |
| 6 | 1.158064000  | 2.712539000  | 0.000553000  |
| 1 | 2.132483000  | 3.190859000  | 0.001017000  |
| 6 | -0.001504000 | 3.479060000  | 0.000078000  |
| 1 | 0.055860000  | 4.559548000  | 0.000232000  |
| 6 | -1.222337000 | 2.816414000  | -0.000492000 |
| 1 | -2.151890000 | 3.372191000  | -0.000866000 |
| 6 | -1.236037000 | 1.431060000  | -0.000560000 |
| 6 | 1.236037000  | -1.431060000 | -0.000560000 |
| 6 | 1.222337000  | -2.816414000 | -0.000492000 |
| 1 | 2.151890000  | -3.372191000 | -0.000866000 |
| 6 | 0.001504000  | -3.479060000 | 0.000078000  |
| 1 | -0.055860000 | -4.559548000 | 0.000232000  |
| 6 | -1.158064000 | -2.712539000 | 0.000553000  |
| 1 | -2.132483000 | -3.190859000 | 0.001017000  |
| 6 | 0.018632000  | -0.744056000 | -0.000086000 |
| 6 | -0.018632000 | 0.744056000  | -0.000086000 |
| 1 | 2.158020000  | -0.868925000 | -0.000908000 |
| 1 | -2.158020000 | 0.868925000  | -0.000908000 |

*2,2'-bipyridine twisted*

|   |              |              |              |
|---|--------------|--------------|--------------|
| 7 | -0.390089000 | 1.356305000  | -1.120439000 |
| 7 | 0.390089000  | -1.356305000 | -1.120439000 |
| 6 | -0.397109000 | 2.685083000  | -1.145669000 |



|   |              |              |              |
|---|--------------|--------------|--------------|
| 1 | -0.727053000 | 3.141807000  | -2.073730000 |
| 6 | -0.014035000 | 3.479858000  | -0.070204000 |
| 1 | -0.036759000 | 4.558766000  | -0.149166000 |
| 6 | 0.397112000  | 2.847262000  | 1.094152000  |
| 1 | 0.715513000  | 3.422020000  | 1.954977000  |
| 6 | 0.404305000  | 1.460857000  | 1.134368000  |
| 6 | -0.404305000 | -1.460857000 | 1.134368000  |
| 6 | -0.397112000 | -2.847262000 | 1.094152000  |
| 1 | -0.715513000 | -3.422020000 | 1.954977000  |
| 6 | 0.014035000  | -3.479858000 | -0.070204000 |
| 1 | 0.036759000  | -4.558766000 | -0.149166000 |
| 6 | 0.397109000  | -2.685083000 | -1.145669000 |
| 1 | 0.727053000  | -3.141807000 | -2.073730000 |
| 6 | -0.002299000 | -0.745548000 | 0.002454000  |
| 6 | 0.002299000  | 0.745548000  | 0.002454000  |
| 1 | -0.740729000 | -0.939310000 | 2.020409000  |
| 1 | 0.740729000  | 0.939310000  | 2.020409000  |

1,10-phenanthroline

|   |              |              |              |
|---|--------------|--------------|--------------|
| 7 | 1.382042000  | -1.555718000 | 0.000399000  |
| 7 | -1.382054000 | -1.555734000 | -0.000525000 |
| 6 | 2.698807000  | -1.543323000 | 0.000601000  |
| 1 | 3.186775000  | -2.513613000 | 0.001172000  |
| 6 | 3.470845000  | -0.369931000 | 0.000091000  |
| 1 | 4.551689000  | -0.427392000 | 0.000031000  |
| 6 | 2.818869000  | 0.838232000  | -0.000458000 |
| 1 | 3.371282000  | 1.770733000  | -0.001190000 |
| 6 | 1.412612000  | 0.866207000  | -0.000324000 |
| 6 | 0.677057000  | 2.092805000  | -0.000243000 |
| 1 | 1.226391000  | 3.027184000  | -0.000562000 |
| 6 | -0.677063000 | 2.092796000  | 0.000134000  |
| 1 | -1.226410000 | 3.027166000  | 0.000394000  |
| 6 | -1.412598000 | 0.866182000  | 0.000290000  |
| 6 | -2.818884000 | 0.838226000  | 0.000587000  |
| 1 | -3.371247000 | 1.770757000  | 0.001366000  |
| 6 | -3.470853000 | -0.369911000 | 0.000091000  |
| 1 | -4.551693000 | -0.427425000 | 0.000370000  |
| 6 | -2.698783000 | -1.543327000 | -0.000592000 |
| 1 | -3.186805000 | -2.513596000 | -0.001239000 |
| 6 | -0.727980000 | -0.378440000 | -0.000020000 |
| 6 | 0.727989000  | -0.378459000 | -0.000067000 |
